# Supplementary material for: Novel Ciliate Genetic Code Variants Including the Reassignment of All Three Stop Codons to Sense Codons in Condylostoma magnum
Source: PubMed Central journal article supplement — Mol Biol Evol. 2016 Aug 8;33(11):2885–9. doi: 10.1093/molbev/msw166 (PMC5062323; doi:10.1093/molbev/msw166), 2016-08-08
Supplement: supp_msw166_Heaphy_et_al_SI.pdf [file supp_msw166_Heaphy_et_al_SI.pdf]

**Novel ciliate genetic code variants including the reassignment of all three stop codons to sense codons in *C. magnum***

Supplementary Information

**Supplementary Table S1.** Absolute substitution count of each amino acid identified at TAA per species with stop codon count.

| TAA                                       | A      | C     | D      | E      | F     | G     | H     | I     | K      | L      | M     | N     | P     | Q      | R      | S      | T     | V     | W     | Y      |
|-------------------------------------------|--------|-------|--------|--------|-------|-------|-------|-------|--------|--------|-------|-------|-------|--------|--------|--------|-------|-------|-------|--------|
| <i>Anophryoides haemophila</i> - 11,848   | 17285  | 1623  | 14847  | 29652  | 3756  | 9422  | 8341  | 6750  | 27678  | 11975  | 5235  | 13548 | 7381  | 78550  | 16157  | 16791  | 13325 | 8539  | 1165  | 4229   |
| <i>Ariasterostoma sp.</i> ATCC - 5,046    | 13123  | 1543  | 12463  | 23334  | 3959  | 8237  | 5250  | 5298  | 20950  | 9559   | 4423  | 9491  | 7068  | 45021  | 16060  | 14601  | 10702 | 7279  | 844   | 4098   |
| <i>Blepharisma japonicum</i> - 233        | 23     | 8     | 11     | 13     | 40    | 25    | 8     | 19    | 23     | 29     | 35    | 10    | 26    | 64     | 23     | 31     | 24    | 18    | 4     | 9      |
| <i>Campanella umbellaria</i> - 45,644     | 125319 | 8556  | 253397 | 953229 | 16068 | 75543 | 35122 | 31327 | 145035 | 52789  | 20064 | 80293 | 61883 | 159688 | 87219  | 102955 | 80266 | 51116 | 6547  | 22015  |
| <i>Carchesium polypinum</i> - 7,877       | 22184  | 1490  | 35350  | 120401 | 3498  | 11458 | 6815  | 6005  | 27493  | 12475  | 5314  | 14060 | 9067  | 59827  | 17898  | 19622  | 14183 | 9820  | 1249  | 4395   |
| <i>Climacostomum virens</i> - 1,379       | 126    | 14    | 78     | 211    | 67    | 99    | 43    | 48    | 200    | 164    | 45    | 58    | 78    | 121    | 133    | 96     | 82    | 96    | 100   | 235    |
| <i>Colpoda aspera</i> - 371               | 48     | 11    | 34     | 40     | 14    | 63    | 16    | 40    | 61     | 48     | 8     | 30    | 30    | 79     | 47     | 65     | 43    | 28    | 8     | 35     |
| <i>Condylostoma magnum</i> - 33,173       | 129735 | 17439 | 114984 | 195753 | 39815 | 94124 | 48865 | 66341 | 168526 | 112746 | 37029 | 84291 | 65585 | 321755 | 120915 | 112301 | 92649 | 80416 | 10700 | 38980  |
| <i>Euplotes focardii</i> - 468            | 378    | 64    | 376    | 803    | 60    | 189   | 113   | 292   | 629    | 434    | 151   | 349   | 142   | 1540   | 459    | 297    | 325   | 285   | 59    | 105    |
| <i>Euplotes crassus</i> - 326             | 61     | 41    | 46     | 90     | 31    | 88    | 120   | 73    | 133    | 227    | 28    | 79    | 47    | 56     | 46     | 88     | 81    | 59    | 2     | 39     |
| <i>Fabrea salina</i> - 228                | 27     | 11    | 20     | 23     | 11    | 23    | 4     | 18    | 39     | 22     | 22    | 9     | 13    | 16     | 19     | 27     | 13    | 91    | 3     | 43     |
| <i>Favella ehrenbergii</i> - 2,902        | 6162   | 989   | 6488   | 11126  | 1474  | 4776  | 2452  | 2411  | 9653   | 4595   | 1956  | 4963  | 3080  | 20289  | 7085   | 7528   | 4840  | 3789  | 352   | 1541   |
| <i>Litonotus pictus</i> - 85              | 12     | 3     | 6      | 9      | 1     | 9     | 1     | 5     | 10     | 6      | 0     | 3     | 1     | 10     | 3      | 15     | 6     | 11    | 0     | 1      |
| <i>Mesodinium pulex</i> - 3,697           | 8702   | 1594  | 5235   | 6442   | 23596 | 4065  | 6376  | 7983  | 6165   | 14576  | 4165  | 4624  | 3528  | 4186   | 5921   | 5668   | 6191  | 8972  | 5317  | 65512  |
| <i>Myrionecta rubra</i> - 8,430           | 18607  | 5051  | 12104  | 16825  | 63504 | 12470 | 20626 | 17073 | 19537  | 35174  | 9677  | 14267 | 9640  | 11678  | 21005  | 18202  | 20469 | 19300 | 18360 | 176999 |
| <i>Paralembus digitiformis</i> - 19,177   | 23613  | 2537  | 19315  | 39125  | 5351  | 11900 | 9585  | 8444  | 37384  | 18148  | 7532  | 18456 | 10517 | 130410 | 24578  | 23132  | 18050 | 11978 | 1513  | 6679   |
| <i>Paramecium bursaria</i> - 26,330       | 59923  | 6056  | 55988  | 104888 | 13215 | 34555 | 24457 | 21491 | 87435  | 42138  | 17199 | 45600 | 28873 | 240271 | 58795  | 55901  | 42763 | 30595 | 3910  | 16049  |
| <i>Platyophrya macrostoma</i> - 207       | 36     | 0     | 12     | 22     | 10    | 18    | 2     | 15    | 19     | 18     | 3     | 10    | 22    | 13     | 8      | 24     | 15    | 17    | 1     | 71     |
| <i>Protocruzia adherens</i> - 305         | 29     | 2     | 18     | 43     | 13    | 21    | 4     | 7     | 16     | 31     | 8     | 13    | 19    | 29     | 12     | 30     | 19    | 24    | 1     | 8      |
| <i>Pseudokeronopsis sp.</i> OXSA - 5,693  | 14102  | 1862  | 12243  | 22637  | 3831  | 9765  | 5782  | 5775  | 21382  | 9837   | 4143  | 10715 | 6416  | 51836  | 15031  | 16047  | 11362 | 7860  | 847   | 3739   |
| <i>Strombidinopsis acuminata</i> - 10,655 | 34974  | 3366  | 32823  | 60687  | 8827  | 21871 | 14908 | 12762 | 47755  | 22815  | 9320  | 25315 | 17093 | 103384 | 34872  | 34253  | 24819 | 18002 | 2612  | 10688  |
| <i>Strombidium inclinatum</i> - 3,196     | 7386   | 1073  | 6965   | 13826  | 1754  | 4242  | 3047  | 3472  | 12432  | 5730   | 2081  | 5436  | 5000  | 24633  | 8812   | 7980   | 5513  | 4256  | 544   | 2290   |
| <i>Tiarina fusus</i> - 3,717              | 7524   | 576   | 5546   | 11241  | 2017  | 4382  | 3305  | 2611  | 9715   | 5376   | 2323  | 5633  | 3332  | 42556  | 6094   | 7307   | 5256  | 3332  | 332   | 2264   |
| <i>Uronema sp.</i> Bbcil - 24,394         | 32282  | 3713  | 29512  | 56524  | 7051  | 18880 | 15388 | 11419 | 50014  | 23146  | 10138 | 25652 | 15363 | 151845 | 31681  | 33949  | 25591 | 16555 | 2007  | 8659   |

**Supplementary Table S2.** Absolute substitution count of each amino acid identified at TAG per species with stop codon count.

| TAG                                      | A     | C    | D     | E      | F     | G     | H     | I     | K     | L     | M     | N     | P     | Q      | R     | S     | T     | V     | W     | Y      |
|------------------------------------------|-------|------|-------|--------|-------|-------|-------|-------|-------|-------|-------|-------|-------|--------|-------|-------|-------|-------|-------|--------|
| <i>Anophryoides haemophila</i> - 2,221   | 2539  | 353  | 2275  | 3883   | 888   | 1529  | 1624  | 1170  | 4310  | 1888  | 835   | 2005  | 1107  | 14511  | 2460  | 2472  | 2036  | 1571  | 167   | 822    |
| <i>Aristerostoma sp.ATCC</i> - 7,481     | 20899 | 1861 | 18499 | 36297  | 5364  | 11993 | 9397  | 7956  | 33140 | 15459 | 6618  | 15656 | 8724  | 87407  | 23823 | 20333 | 16235 | 11340 | 1388  | 5877   |
| <i>Blepharisma japonicum</i> - 114       | 24    | 2    | 12    | 32     | 61    | 28    | 3     | 24    | 20    | 44    | 5     | 14    | 37    | 17     | 15    | 67    | 32    | 26    | 68    | 14     |
| <i>Campanella umbellaria</i> - 10,935    | 30950 | 1919 | 57310 | 204178 | 3897  | 16439 | 8392  | 7555  | 34863 | 13313 | 4977  | 20656 | 15137 | 44439  | 24386 | 26579 | 19396 | 11594 | 1625  | 5820   |
| <i>Carchesium polypinum</i> - 6,704      | 16139 | 1269 | 30665 | 95046  | 3366  | 8828  | 5582  | 5099  | 20746 | 8965  | 3653  | 12160 | 7458  | 27385  | 12644 | 15668 | 10742 | 7907  | 991   | 4096   |
| <i>Climacostomum virens</i> - 1,108      | 205   | 44   | 136   | 109    | 74    | 124   | 37    | 78    | 273   | 249   | 38    | 111   | 105   | 161    | 279   | 114   | 117   | 170   | 16    | 43     |
| <i>Colpoda aspera</i> - 140              | 22    | 2    | 7     | 10     | 9     | 33    | 0     | 6     | 349   | 10    | 1     | 5     | 5     | 33     | 28    | 15    | 11    | 10    | 1     | 10     |
| <i>Condyllostoma magnum</i> - 16,614     | 63664 | 6129 | 59307 | 115776 | 13578 | 42131 | 26769 | 23566 | 95483 | 40945 | 16398 | 44399 | 33860 | 202183 | 67984 | 59092 | 45188 | 30744 | 4315  | 14610  |
| <i>Euplotes focardii</i> - 341           | 560   | 47   | 341   | 746    | 92    | 191   | 296   | 167   | 854   | 355   | 105   | 325   | 499   | 2326   | 586   | 387   | 366   | 279   | 52    | 96     |
| <i>Euplotes crassus</i> - 182            | 56    | 48   | 163   | 91     | 164   | 38    | 84    | 28    | 98    | 126   | 48    | 65    | 41    | 31     | 57    | 92    | 37    | 42    | 3     | 52     |
| <i>Fabrea salina</i> - 95                | 19    | 1    | 14    | 16     | 36    | 13    | 2     | 7     | 12    | 12    | 2     | 11    | 17    | 1      | 9     | 4     | 8     | 4     | 13    | 11     |
| <i>Favella ehrenbergii</i> - 8,042       | 16103 | 2448 | 15723 | 28672  | 4155  | 11363 | 7896  | 7413  | 26071 | 15081 | 4903  | 14266 | 9243  | 67165  | 17176 | 19522 | 13577 | 9858  | 958   | 5428   |
| <i>Litonotus pictus</i> - 25             | 1     | 0    | 3     | 1      | 1     | 1     | 0     | 2     | 1     | 4     | 0     | 2     | 0     | 2      | 0     | 1     | 0     | 0     | 0     | 0      |
| <i>Mesodinium pulex</i> - 10,569         | 26736 | 5951 | 13729 | 20740  | 88148 | 12426 | 24730 | 24651 | 20385 | 49318 | 14124 | 14106 | 10300 | 13837  | 20227 | 19279 | 17522 | 28257 | 20854 | 261373 |
| <i>Myrionecta rubra</i> - 3,937          | 10874 | 2518 | 6201  | 8702   | 31984 | 7693  | 10622 | 9312  | 10014 | 18738 | 5309  | 6934  | 4602  | 6823   | 10972 | 9961  | 8856  | 9294  | 12629 | 85771  |
| <i>Paralembus digitiformis</i> - 4,239   | 5071  | 540  | 4177  | 9130   | 1475  | 4061  | 2487  | 1949  | 8469  | 4082  | 1723  | 4135  | 3882  | 25255  | 5795  | 5803  | 3735  | 2936  | 308   | 1222   |
| <i>Paramecium bursaria</i> - 12,620      | 32160 | 3202 | 29047 | 56531  | 8685  | 19135 | 13801 | 12618 | 50903 | 23515 | 10474 | 23591 | 14829 | 127059 | 37341 | 33071 | 25248 | 17587 | 2094  | 9350   |
| <i>Platyophrya macrostoma</i> - 337      | 49    | 6    | 15    | 43     | 14    | 37    | 6     | 26    | 39    | 30    | 5     | 15    | 28    | 16     | 16    | 31    | 59    | 25    | 1     | 76     |
| <i>Protocruzia adherens</i> - 142        | 12    | 5    | 8     | 14     | 5     | 5     | 3     | 3     | 6     | 7     | 0     | 8     | 12    | 20     | 16    | 8     | 7     | 1     | 2     | 2      |
| <i>Pseudokeronopsis sp.OXSA</i> - 11,246 | 27802 | 3758 | 26357 | 49143  | 7434  | 17183 | 13062 | 11644 | 44391 | 21878 | 8681  | 22624 | 14759 | 111534 | 31085 | 32888 | 23024 | 15970 | 1627  | 8209   |
| <i>Strombidinopsis acuminata</i> - 8,385 | 26663 | 3064 | 24233 | 48008  | 6471  | 14677 | 12562 | 9932  | 39981 | 20444 | 7648  | 20249 | 12635 | 95555  | 30313 | 24745 | 20469 | 13731 | 1993  | 7038   |
| <i>Strombidium inclinatum</i> - 8,075    | 18461 | 2819 | 16979 | 30689  | 5667  | 12044 | 9305  | 9017  | 28877 | 16428 | 7687  | 14931 | 9808  | 69855  | 21316 | 21965 | 16267 | 11101 | 1873  | 6312   |
| <i>Tiarina fusus</i> - 1,079             | 4133  | 273  | 2859  | 6209   | 616   | 1937  | 1582  | 1222  | 4633  | 2132  | 1317  | 2329  | 1264  | 15853  | 3732  | 2666  | 2416  | 1796  | 346   | 1057   |
| <i>Uronema sp.Bbcil</i> - 1,796          | 4191  | 486  | 3428  | 6556   | 806   | 2565  | 2206  | 1800  | 6206  | 3140  | 1094  | 3012  | 2050  | 11551  | 4909  | 3336  | 2915  | 2223  | 178   | 997    |

**Supplementary Table S3.** Absolute substitution count of each amino acid identified at TGA per species with stop codon count.

| TGA                                    | A     | C     | D    | E    | F     | G    | H    | I    | K    | L     | M    | N    | P    | Q    | R    | S     | T    | V     | W      | Y     |
|----------------------------------------|-------|-------|------|------|-------|------|------|------|------|-------|------|------|------|------|------|-------|------|-------|--------|-------|
| <i>Anophryoides haemophila</i> - 67    | 3     | 2     | 4    | 14   | 4     | 5    | 1    | 3    | 13   | 10    | 2    | 5    | 2    | 12   | 2    | 3     | 4    | 2     | 0      | 1     |
| <i>Aristerostoma sp.ATCC</i> - 167     | 15    | 5     | 14   | 23   | 4     | 21   | 2    | 11   | 12   | 13    | 4    | 11   | 17   | 25   | 7    | 12    | 6    | 8     | 2      | 1     |
| <i>Blepharisma japonicum</i> - 4199    | 3875  | 1845  | 2508 | 3342 | 17553 | 2911 | 2777 | 5262 | 4049 | 10711 | 2852 | 2527 | 2188 | 2242 | 4169 | 3616  | 3060 | 4304  | 153638 | 12857 |
| <i>Campanella umbellaria</i> - 722     | 100   | 36    | 55   | 63   | 53    | 124  | 49   | 83   | 59   | 171   | 116  | 29   | 69   | 44   | 104  | 80    | 30   | 63    | 86     | 35    |
| <i>Carchesium polypinum</i> - 215      | 21    | 45    | 22   | 6    | 41    | 18   | 12   | 16   | 20   | 23    | 10   | 3    | 17   | 9    | 5    | 19    | 17   | 46    | 83     | 24    |
| <i>Climacostomum virens</i> - 1,664    | 82    | 64    | 120  | 53   | 43    | 177  | 10   | 146  | 38   | 143   | 57   | 50   | 48   | 43   | 227  | 55    | 53   | 128   | 7      | 15    |
| <i>Colpoda aspera</i> - 255            | 27    | 4     | 15   | 28   | 40    | 49   | 16   | 32   | 27   | 47    | 6    | 9    | 40   | 26   | 27   | 53    | 10   | 29    | 77     | 35    |
| <i>Condyllostoma magnum</i> - 3,948    | 2602  | 1204  | 1944 | 2840 | 13556 | 2114 | 1943 | 3261 | 2544 | 6788  | 1571 | 1709 | 1234 | 2103 | 2938 | 2527  | 2790 | 3042  | 110685 | 9520  |
| <i>Euplotes focardii</i> - 2,897       | 13950 | 39423 | 2119 | 2980 | 4190  | 5933 | 2589 | 6805 | 2806 | 14003 | 2711 | 2389 | 2058 | 2365 | 3125 | 10122 | 7705 | 11982 | 1021   | 2997  |
| <i>Euplotes crassus</i> - 3676         | 19172 | 51261 | 2229 | 3306 | 3849  | 4747 | 2329 | 9383 | 4395 | 14913 | 4512 | 4587 | 2976 | 3016 | 3804 | 11203 | 8395 | 17637 | 650    | 3931  |
| <i>Fabrea salina</i> - 55              | 15    | 235   | 3    | 1    | 0     | 64   | 1    | 3    | 1    | 6     | 0    | 3    | 1    | 2    | 12   | 2     | 4    | 14    | 0      | 1     |
| <i>Favella ehrenbergii</i> - 239       | 16    | 42    | 21   | 31   | 5     | 23   | 7    | 8    | 30   | 22    | 5    | 22   | 9    | 17   | 32   | 27    | 18   | 25    | 2      | 7     |
| <i>Litonotus pictus</i> - 24           | 1     | 5     | 1    | 2    | 0     | 1    | 0    | 1    | 3    | 1     | 1    | 0    | 1    | 1    | 0    | 0     | 1    | 0     | 0      | 0     |
| <i>Mesodinium pulex</i> - 190          | 16    | 279   | 18   | 38   | 2     | 11   | 3    | 7    | 17   | 26    | 4    | 13   | 23   | 7    | 12   | 20    | 6    | 23    | 13     | 5     |
| <i>Myrionecta rubra</i> - 100          | 14    | 8     | 7    | 16   | 7     | 25   | 3    | 2    | 11   | 10    | 0    | 5    | 14   | 5    | 21   | 13    | 7    | 9     | 2      | 3     |
| <i>Paralembus digitiformis</i> - 182   | 22    | 10    | 14   | 29   | 6     | 34   | 2    | 39   | 25   | 26    | 8    | 21   | 7    | 20   | 39   | 21    | 12   | 11    | 13     | 3     |
| <i>Paramecium bursaria</i> - 394       | 48    | 9     | 21   | 35   | 20    | 58   | 77   | 33   | 152  | 149   | 15   | 22   | 45   | 63   | 34   | 36    | 42   | 44    | 87     | 95    |
| <i>Platyophrya macrostoma</i> - 142    | 13    | 5     | 10   | 24   | 9     | 34   | 7    | 12   | 23   | 8     | 2    | 5    | 10   | 7    | 7    | 11    | 51   | 8     | 1      | 4     |
| <i>Protocruzia adherens</i> - 157      | 58    | 2     | 14   | 94   | 11    | 11   | 9    | 9    | 70   | 12    | 3    | 13   | 12   | 33   | 72   | 10    | 24   | 16    | 3      | 7     |
| <i>Pseudokeronopsis sp.OXSA</i> - 212  | 114   | 55    | 174  | 219  | 119   | 121  | 121  | 65   | 716  | 101   | 33   | 202  | 18   | 177  | 1385 | 292   | 144  | 127   | 74     | 191   |
| <i>Strombidinopsis acuminata</i> - 274 | 77    | 233   | 81   | 98   | 34    | 59   | 71   | 81   | 122  | 195   | 19   | 88   | 29   | 72   | 222  | 92    | 72   | 119   | 23     | 19    |
| <i>Strombidium inclinatum</i> - 77     | 2     | 1     | 16   | 8    | 4     | 5    | 5    | 3    | 22   | 3     | 7    | 8    | 9    | 12   | 17   | 5     | 5    | 3     | 0      | 2     |
| <i>Tiarina fusus</i> - 193             | 15    | 232   | 65   | 18   | 7     | 354  | 4    | 1    | 16   | 17    | 0    | 6    | 20   | 12   | 28   | 15    | 18   | 12    | 2      | 9     |
| <i>Uronema sp.Bbcil</i> - 38           | 2     | 58    | 1    | 3    | 0     | 1    | 0    | 1    | 5    | 4     | 1    | 0    | 3    | 2    | 1    | 2     | 3    | 1     | 1      | 0     |

**Supplementary Table S4.** Absolute substitution count of each amino acid identified at 95% conservation threshold with a minimum of 100 homologous sequences

|                                 | A   | C    | D    | E      | F    | G   | H    | I   | K   | L    | M   | N   | P   | Q     | R   | S   | T   | V   | W     | Y     |
|---------------------------------|-----|------|------|--------|------|-----|------|-----|-----|------|-----|-----|-----|-------|-----|-----|-----|-----|-------|-------|
| <i>Myrionecta</i> -TAA-115      | 0   | 0    | 141  | 0      | 661  | 0   | 1160 | 0   | 0   | 0    | 0   | 0   | 0   | 0     | 119 | 0   | 0   | 0   | 184   | 17807 |
| <i>Myrionecta</i> -TAG-50       | 0   | 0    | 0    | 0      | 163  | 0   | 0    | 0   | 0   | 0    | 0   | 0   | 0   | 0     | 243 | 0   | 0   | 0   | 0     | 8162  |
| <i>Mesodinium</i> -TAA-31       | 0   | 0    | 0    | 0      | 130  | 0   | 0    | 0   | 0   | 0    | 0   | 0   | 0   | 0     | 0   | 0   | 0   | 0   | 0     | 5093  |
| <i>Mesodinium</i> -TAG-143      | 0   | 0    | 0    | 123    | 1633 | 132 | 0    | 0   | 0   | 0    | 0   | 0   | 0   | 0     | 196 | 0   | 0   | 0   | 0     | 22659 |
| <i>Blepharisma</i> -TGA-199     | 0   | 0    | 0    | 0      | 217  | 0   | 0    | 0   | 0   | 0    | 0   | 0   | 0   | 0     | 0   | 0   | 0   | 0   | 37332 | 0     |
| <i>Condylostoma</i> -TAA-231    | 439 | 0    | 107  | 707    | 0    | 312 | 239  | 0   | 320 | 0    | 0   | 154 | 107 | 38328 | 789 | 0   | 0   | 0   | 0     | 0     |
| <i>Condylostoma</i> -TAG-187    | 0   | 0    | 227  | 964    | 0    | 739 | 307  | 0   | 384 | 239  | 104 | 382 | 109 | 32006 | 305 | 248 | 0   | 0   | 0     | 109   |
| <i>Condylostoma</i> -TGA-165    | 0   | 0    | 0    | 0      | 478  | 106 | 0    | 0   | 0   | 0    | 0   | 0   | 0   | 0     | 0   | 0   | 0   | 0   | 29758 | 0     |
| <i>Strombidinopsis</i> -TAA-102 | 0   | 0    | 0    | 210    | 0    | 223 | 0    | 0   | 103 | 0    | 0   | 0   | 110 | 17865 | 0   | 0   | 0   | 0   | 0     | 0     |
| <i>Strombidinopsis</i> -TAG-53  | 0   | 0    | 0    | 218    | 0    | 221 | 0    | 0   | 0   | 0    | 0   | 0   | 0   | 9684  | 0   | 0   | 0   | 0   | 0     | 0     |
| <i>Favella</i> -TAA-19          | 0   | 0    | 0    | 0      | 0    | 0   | 0    | 0   | 0   | 0    | 0   | 0   | 0   | 3141  | 0   | 0   | 0   | 0   | 0     | 0     |
| <i>Favella</i> -TAG-55          | 0   | 0    | 0    | 142    | 0    | 231 | 208  | 0   | 172 | 0    | 0   | 0   | 219 | 9021  | 155 | 0   | 0   | 0   | 0     | 0     |
| <i>Strombidium</i> -TAA-23      | 0   | 0    | 0    | 180    | 0    | 0   | 0    | 0   | 0   | 0    | 0   | 0   | 0   | 4027  | 246 | 0   | 0   | 0   | 0     | 0     |
| <i>Strombidium</i> -TAG-71      | 0   | 0    | 108  | 250    | 168  | 0   | 383  | 0   | 0   | 0    | 0   | 0   | 104 | 13088 | 0   | 0   | 242 | 0   | 0     | 0     |
| <i>Pseudokeronopsis</i> -TAA-50 | 0   | 0    | 0    | 0      | 97   | 240 | 209  | 139 | 104 | 109  | 0   | 0   | 0   | 8436  | 0   | 0   | 0   | 0   | 0     | 0     |
| <i>Pseudokeronopsis</i> -TAG-91 | 0   | 0    | 160  | 1209   | 0    | 0   | 453  | 0   | 110 | 0    | 0   | 154 | 414 | 13678 | 0   | 0   | 0   | 0   | 0     | 0     |
| <i>E.crassus</i> -TGA-49        | 0   | 7930 | 0    | 175    | 0    | 0   | 0    | 0   | 0   | 204  | 0   | 0   | 0   | 0     | 0   | 0   | 0   | 0   | 0     | 495   |
| <i>E.focardi</i> -TGA-57        | 217 | 8345 | 0    | 140    | 0    | 467 | 0    | 0   | 0   | 817  | 0   | 0   | 0   | 0     | 136 | 0   | 0   | 0   | 223   | 0     |
| <i>Aristerostoma</i> -TAA-31    | 0   | 0    | 0    | 151    | 0    | 0   | 0    | 0   | 165 | 0    | 0   | 0   | 0   | 4906  | 223 | 0   | 0   | 0   | 0     | 0     |
| <i>Aristerostoma</i> -TAG-58    | 0   | 0    | 0    | 119    | 0    | 234 | 0    | 0   | 0   | 0    | 0   | 0   | 0   | 9725  | 226 | 112 | 0   | 190 | 0     | 0     |
| <i>Carchesium</i> -TAA-118      | 0   | 0    | 134  | 14629  | 0    | 0   | 0    | 0   | 0   | 0    | 0   | 0   | 0   | 550   | 0   | 101 | 0   | 0   | 0     | 0     |
| <i>Carchesium</i> -TAG-64       | 0   | 0    | 289  | 8510   | 0    | 104 | 0    | 0   | 497 | 0    | 0   | 0   | 0   | 1255  | 0   | 0   | 0   | 0   | 0     | 0     |
| <i>Campanella</i> -TAA-955      | 0   | 0    | 4112 | 171481 | 0    | 0   | 0    | 0   | 0   | 0    | 0   | 0   | 0   | 0     | 0   | 0   | 0   | 0   | 0     | 0     |
| <i>Campanella</i> -TAG-204      | 225 | 0    | 469  | 34497  | 0    | 200 | 0    | 0   | 0   | 0    | 0   | 0   | 0   | 3886  | 0   | 244 | 0   | 0   | 0     | 0     |
| <i>Paramecium</i> -TAA-164      | 0   | 0    | 0    | 485    | 0    | 0   | 0    | 298 | 298 | 127  | 0   | 0   | 0   | 28294 | 134 | 558 | 0   | 0   | 0     | 0     |
| <i>Paramecium</i> -TAG-91       | 0   | 0    | 0    | 114    | 0    | 0   | 0    | 0   | 0   | 138  | 0   | 0   | 336 | 18431 | 118 | 0   | 0   | 0   | 0     | 0     |
| <i>Tiarina</i> -TAA-52          | 0   | 0    | 0    | 273    | 197  | 196 | 0    | 0   | 0   | 0    | 0   | 0   | 156 | 8805  | 0   | 0   | 0   | 0   | 0     | 0     |
| <i>Uronema</i> -TAA-137         | 105 | 0    | 0    | 276    | 0    | 132 | 0    | 0   | 234 | 0    | 0   | 248 | 208 | 23296 | 0   | 0   | 0   | 0   | 0     | 0     |
| <i>Uronema</i> -TAG-8           | 0   | 0    | 0    | 0      | 0    | 0   | 0    | 0   | 0   | 0    | 0   | 0   | 0   | 1476  | 0   | 0   | 0   | 0   | 0     | 0     |
| <i>Paralembus</i> -TAA-134      | 0   | 0    | 0    | 263    | 0    | 0   | 0    | 0   | 591 | 1086 | 0   | 0   | 190 | 24192 | 251 | 0   | 0   | 0   | 97    | 0     |
| <i>Paralembus</i> -TAG-31       | 0   | 0    | 0    | 198    | 0    | 586 | 0    | 0   | 0   | 0    | 0   | 392 | 0   | 4344  | 101 | 0   | 0   | 0   | 0     | 0     |
| <i>Anophryoides</i> -TAA-64     | 0   | 0    | 0    | 326    | 0    | 108 | 0    | 0   | 216 | 0    | 0   | 0   | 0   | 10891 | 0   | 0   | 0   | 0   | 0     | 0     |
| <i>Anophryoides</i> -TAG-20     | 0   | 0    | 0    | 0      | 0    | 0   | 0    | 0   | 0   | 0    | 0   | 0   | 0   | 3395  | 0   | 0   | 0   | 0   | 0     | 0     |

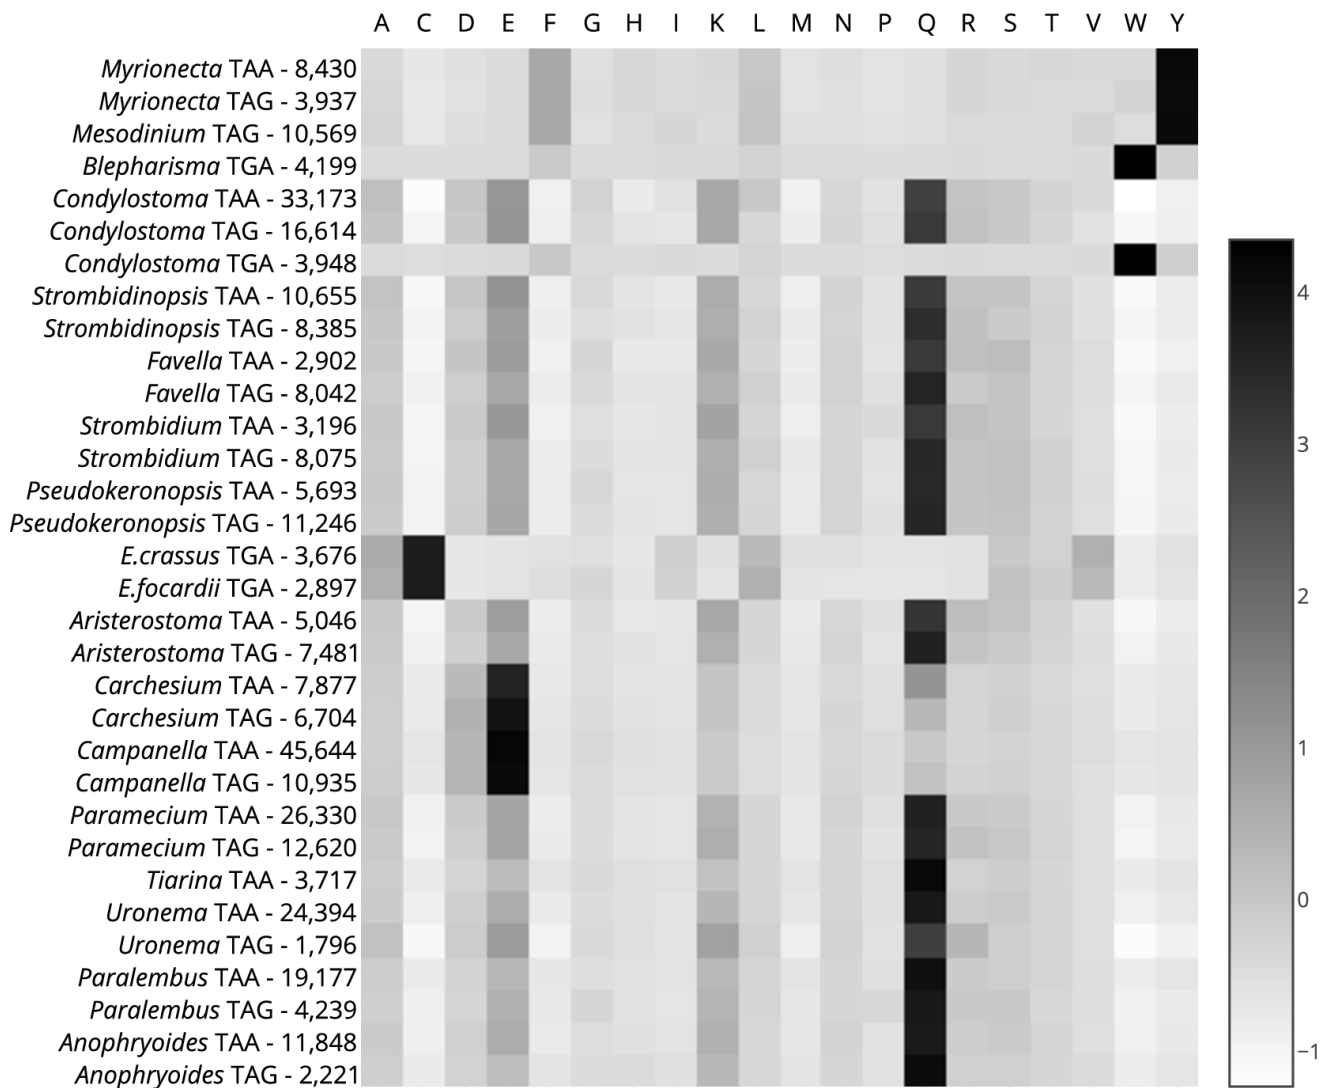

**Supplementary Fig. S1.** Identification of amino acid specifications of the reassigned codons. Each row corresponds to a single reassigned codon. The organism source of a codon, its identity and the total number of occurrences in aligned sequences are indicated on the left. The frequencies of amino acid substitutions are shown as heatmaps according to their Z-scores.

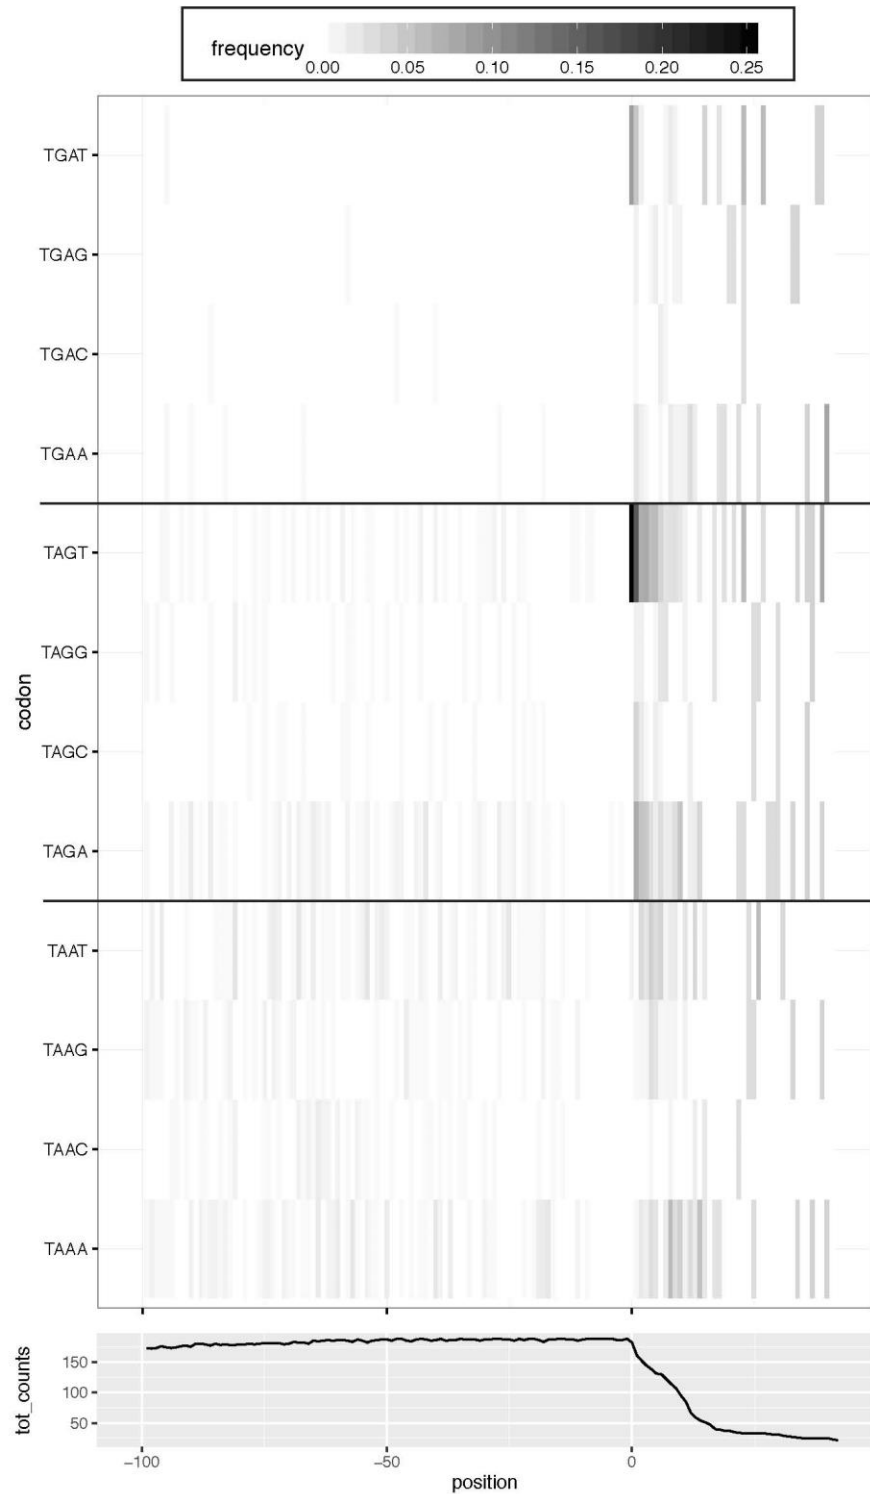

**Supplementary Fig. S2.** Frequency of stop quadruplets (stop codon with a nucleotide adjacent at 3' end) relative to expected positions (zero on axis x) of translation termination in *Condylostoma*. Top panel – frequency of each out of 12 quadruplets. Bottom panel – total number of quadruplets found at corresponding location.
